# Supplementary material
Source: PubMed Central journal article supplement (PMC2797275)
Supplement: supp_M109.037184_jbc.M109.037184-1.pdf [file supp_M109.037184_jbc.M109.037184-1.pdf]

**Suppl. Table 1, Pearson's coefficient of colocalization**

|           | Mean | SEM  |
|-----------|------|------|
| TRPML1-WT | 0.82 | 0.04 |
| R427P     | 0.59 | 0.05 |
| C430P     | 0.33 | 0.03 |
| C431P     | 0.35 | 0.07 |
| Va        | 0.31 | 0.03 |
| A433P     | 0.80 | 0.05 |

Confocal images were taken using a Leica (TCS SP5) microscope. Pearson's coefficient of colocalization (between Lamp-1 and EGFP) was calculated by using the JACop plugin of the ImageJ program.

**Dong et al. Suppl. Table 1**
